# Supplementary material
Source: PubMed Central journal article supplement (PMC3044385)
Supplement: 1014418108_pnas.201014418SI.pdf [file 1014418108_pnas.201014418SI.pdf]

# Supporting Information

Takashima et al. 10.1073/pnas.1014418108

## SI Materials and Methods

**Measurement of Time Delays.** The velocity of movement of the luciferase expression domain relative to the posterior tip of the PSM was measured from the spatiotemporal profiles of [Movie S1](#) ([Fig. S1](#)) so that the space distance can be converted into the time distance. The propagation speed was found to be  $\sim 1$  unit/20 min ( $= 0.05$  unit/min) during phase A and 1 unit/40min ( $= 0.025$  unit/min) during phases B and C. One unit is defined as one somite length. For definition of phases A–C, see [Fig. 2](#) legend. To determine the space distance between the reporter expression and *Hes7* transcription, the PSM samples were subjected to in situ hybridization with the first intron as a probe after imaging of reporter expression. To determine the space distance between the reporter expression and *Hes7* protein expression, the PSM samples were subjected to immunostaining with *Hes7* antibody after imaging of reporter expression. Because the expression domains were propagated into the anterior region, the distance from the last somite border to the anterior end of the reporter, the intron, and *Hes7* protein expression was measured. During in situ hybridization and immunostaining, the size of the PSM was changed and therefore normalized to the original size. The distance between the anterior ends of the reporter expression and the intron/*Hes7* protein expression was measured and then converted into the time difference on the basis of the propagation speed.

**Mathematical Simulation: Significance of Delays.** *Hes7* oscillations are simulated with the following equations (1),

$$\begin{aligned}\frac{dp(t)}{dt} &= am(t - T_p) - bp(t) \\ \frac{dm(t)}{dt} &= f(p(t - T_m)) - cm(t),\end{aligned}$$

where  $p(t)$  and  $m(t)$  are the quantities of functional *Hes7* protein and *Hes7* mRNA per cell at time  $t$ , respectively, and  $f(p)$  is the rate of initiation of transcription, which depends on the amount of the protein,  $p$ , present at the time of initiation.  $a$  is the rate constant for translation, and  $b$  and  $c$  are the degradation rate constants for *Hes7* protein and *Hes7* mRNA, respectively, which are simply related to the half-lives of the molecules:

$$b = \frac{\ln 2}{\tau_p}, \quad c = \frac{\ln 2}{\tau_m}.$$

Because transcription is inhibited by *Hes7* protein, which acts as a dimer, we assume

$$f(p) = \frac{k}{1 + (p/p_{\text{crit}})^2},$$

where  $k$  is the number of molecules of *Hes7* mRNA synthesized per unit time in the absence of inhibition and  $p_{\text{crit}}$  is the amount of protein that gives half-maximal inhibition. We set  $a = 4.5$  protein molecules per mRNA molecule per min,  $p_{\text{crit}} = 40$  molecules per cell,  $k = 33$  mRNA molecules per cell per min, and  $\tau_m = 3$  min. We assume that the *Hes7* protein half-life  $\tau_p = 20$  min,  $T_p = 8$  min, and  $T_m = 29$  min. Under these conditions, oscillatory expression continues ([Fig. S3A](#)). In contrast, when  $T_m = 10$  min (19 min shorter), oscillations are abolished ([Fig. S3C](#)).

**Mathematical Simulation: Distributed Delays.** The amplitude of the *Hes7* reporter oscillation was different depending on whether the introns were present ([Fig. 1 C and D](#)). We hypothesized that the cause of these differences is related to the nature of the

introns (discrete vs. distributed). The average signal of both reporters seemed to increase, at least during the first three peaks ([Fig. 1 C and D](#)). On the other hand, the amplitude seemed to be different between pH7-UbLuc-In(+) and pH7-UbLuc-In(-). In the pH7-UbLuc-In(-) reporter, the average signal was  $\sim 2$  at 3 h and  $\sim 3$  at 5 h, so that there was an approximate increase of 0.5-fold units every hour. In the pH7-UbLuc-In(+) reporter, the average signal was  $\sim 1.5$  at 2 h and  $\sim 2.5$  at 4.5 h, so that there was an approximate increase of 0.4-fold units every hour. To model this observation, we hypothesized that this relatively similar signal increase is due to increasing amounts of luciferase substrate inside the cells [function  $s(t)$  in [Eq. S1](#)]. Regarding the amplitude differences, the amplitude of the pH7-UbLuc-In(-) reporter was  $\sim 4$ -fold whereas the amplitude of the pH7-UbLuc-In(+) reporter was  $\sim 2$ -fold. To model this observation, we hypothesized that the intronic delay is distributed around an average value.

We used the previously described model (1) with an additional variable  $l$  for the luminescence:

$$\begin{aligned}\frac{dp}{dt} &= am(t - T_p) - \frac{\ln 2}{T_p} p(t) \\ \frac{dm}{dt} &= \frac{k}{1 + (p(t - T_m)/p_{\text{crit}})^2} - \frac{\ln 2}{T_m} m(t) \\ \frac{dl}{dt} &= \frac{ks(t)}{1 + (\int_0^\infty p(t - T_l)g_v^r(T_l)dT_l/p_{\text{crit}})^2} - \frac{\ln 2}{T_m} l(t).\end{aligned}\quad [\text{S1}]$$

The function  $s(t)$  stands for the intracellular luciferase substrate. To account for the distributed delay, we integrated a delayed protein concentration  $p(t - T_l)$  weighted with a probability distribution  $g_v^r(T_l)$  from  $T_l = 0$  to  $T_l = \infty$  (2, 3). The probability distribution  $g_v^r(T_l) = (v^{r+1}/r!)T_l^r e^{-vT_l}$  showed a maximum at  $T_l = r/v$  and was zero for  $T_l = 0$  and for  $T_l \rightarrow \infty$ . The value of  $r$  influenced the shape of the probability distribution  $g_v^r(T_l)$  from a broad distribution for low  $r$  to a very sharp distribution approximating a discrete delay for high  $r$ . To simulate the integral differential equation, we need to convert it into a set of ordinary differential equations using the linear chain trick (2), which results in

$$\begin{aligned}\frac{dl}{dt} &= \frac{ks(t)}{1 + (x_r/p_{\text{crit}})^2} - \frac{\ln 2}{T_m} l(t) \\ \frac{dx_0}{dt} &= v(p(t) - x_0(t)) \\ \frac{dx_j}{dt} &= v(x_{j-1}(t) - x_j(t)), \quad j = 1, \dots, r.\end{aligned}\quad [\text{S2}]$$

For  $r = 1$  and  $v = r/T_l$ , the set of equations becomes

$$\begin{aligned}\frac{dp}{dt} &= am(t - T_p) - \frac{\ln 2}{T_p} p(t) \\ \frac{dm}{dt} &= \frac{k}{1 + (p(t - T_m)/p_{\text{crit}})^2} - \frac{\ln 2}{T_m} m(t) \\ \frac{dl}{dt} &= \frac{ks(t)}{1 + (x_1/p_{\text{crit}})^2} - \frac{\ln 2}{T_m} l(t) \\ \frac{dx_0}{dt} &= \frac{r}{T_l}(p(t) - x_0(t)) \\ \frac{dx_1}{dt} &= \frac{r}{T_l}(x_0(t) - x_1(t)).\end{aligned}\quad [\text{S3}]$$

To simulate the previous equation system, we chose the same parameter values as previously described (1); that is,  $a = 4.5$ ,  $p_{\text{crit}} = 40$ ,











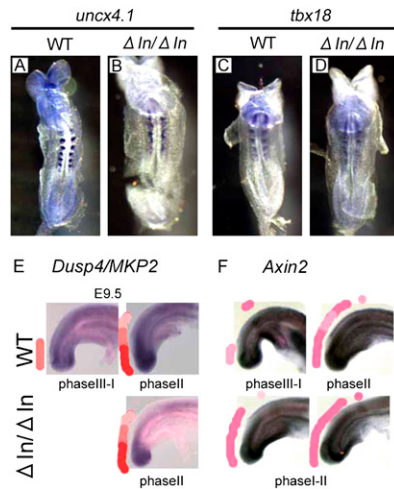

**Fig. 57.** Patterning defects in *Hes7* intronless mice. (A–D) *Uncx4.1* (A and B) and *Tbx18* (C and D) expression in E8.5 wild-type (A and C) and *Hes7* intronless (B and D) embryos was examined by in situ hybridization. *Uncx4.1* and *Tbx18* expression was not properly segmented in *Hes7* intronless mice. Anterior is to the top in A–D. (E) *Dusp4/MKP2* and *Axin2* expression. *Dusp4/MKP2* expression oscillates in wild-type embryos at E9.5.  $n = 4/9$  (phase III-I) and  $n = 5/9$  (phase II). (Lower Left) By contrast, *Hes7* intronless mice lose the oscillation of *Dusp4/MKP2* expression.  $n = 4$ . (F) *Axin2* expression was dynamic in wild-type embryos at E9.5.  $n = 7/9$  (phase III-I) and  $n = 2/9$  (phase II). (Lower Right) *Axin2* expression was still variable but less dynamic in *Hes7* intronless embryos.  $n = 2/7$  (phase I) and  $n = 5/7$  (phase II).

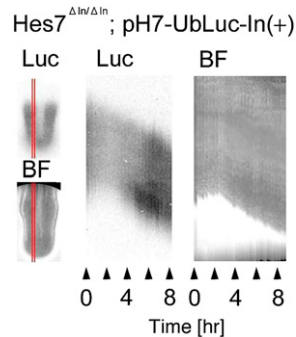

**Fig. 58.** Reporter expression in *Hes7* intronless mice. pH7-UbLuc-In(+) reporter was introduced into *Hes7* intronless mice. Real-time imaging of *Hes7* promoter activity in the PSM explant culture was performed (Luc), and spatiotemporal profiles of the reporter expression were made. Oscillatory reporter expression was not detectable, although some difference in amplitude was observed. Clear segmentation was not observed in a bright field (BF).

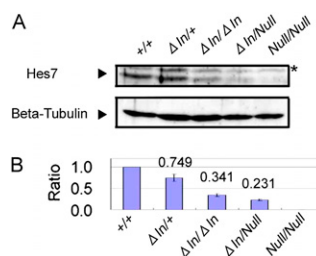

**Fig. 59.** Western blot analysis of *Hes7* expression in the PSM. (A) Proteins were extracted from the posterior parts of embryos, and the average expression levels of *Hes7* protein were analyzed by Western blot. The asterisk indicates a nonspecific band. (B) Relative average levels of *Hes7* protein expression. The average of three independent samples with a SE was determined for each genotype. Each value was normalized with that of  $\beta$ -tubulin. About 34% of the wild-type levels of *Hes7* protein were expressed in *Hes7* intronless mice ( $\Delta In/\Delta In$ ).

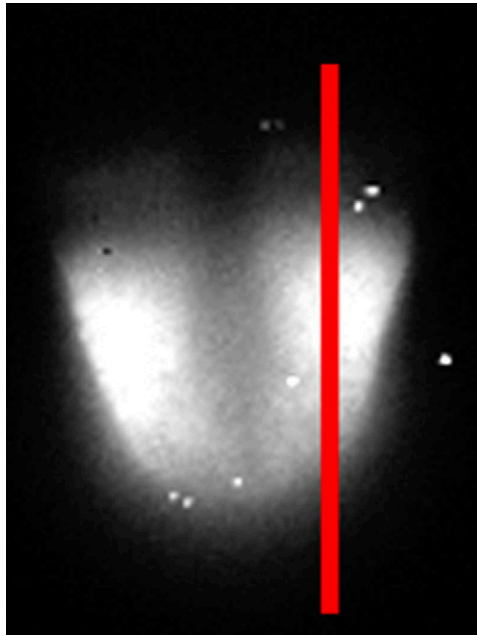

**Movie S1.** Time-lapse images of the PSM of a pH7-UbLuc-In(-) embryo at E10.5. Images were taken by 20-min exposure and binning of pixels  $4 \times 4$  over a period of 10 h. Oscillations were propagated from the posterior to the anterior PSM.

[Movie S1](#)

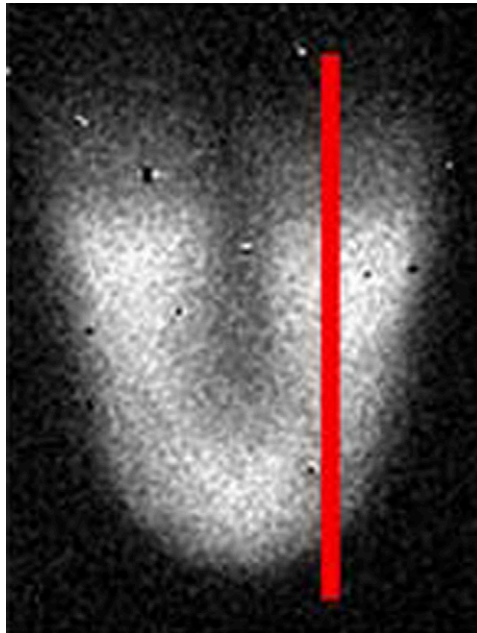

**Movie S2.** Time-lapse images of the PSM of a pH7-UbLuc-In(+) embryo at E10.5. Images were taken by 20-min exposure and binning of pixels  $4 \times 4$  over a period of 10 h. Oscillations were propagated from the posterior to the anterior PSM.

[Movie S2](#)
